# Supplementary material for: Effect of Curcumin in Experimental Pulmonary Tuberculosis: Antimycobacterial Activity in the Lungs and Anti-Inflammatory Effect in the Brain
Source: MDPI journal article supplement (doi:10.3390/ijms23041964), 2022-02-10
Supplement: s1 [file s1]

# Effect of Curcumin in Experimental Pulmonary Tuberculosis: Antimycobacterial Activity in the Lungs and Anti-Inflammatory Effect in the Brain

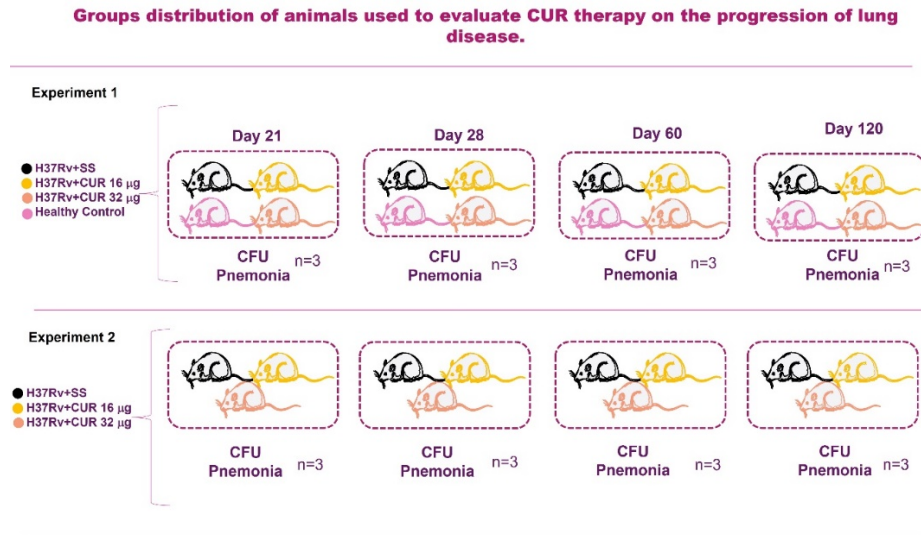

**Figure S1.** Animals' group's distributions used to evaluate CUR therapy on the progression of lung disease per experiment. Two independent experiments were done, and 84 mice were used (3/day/group/experiment).

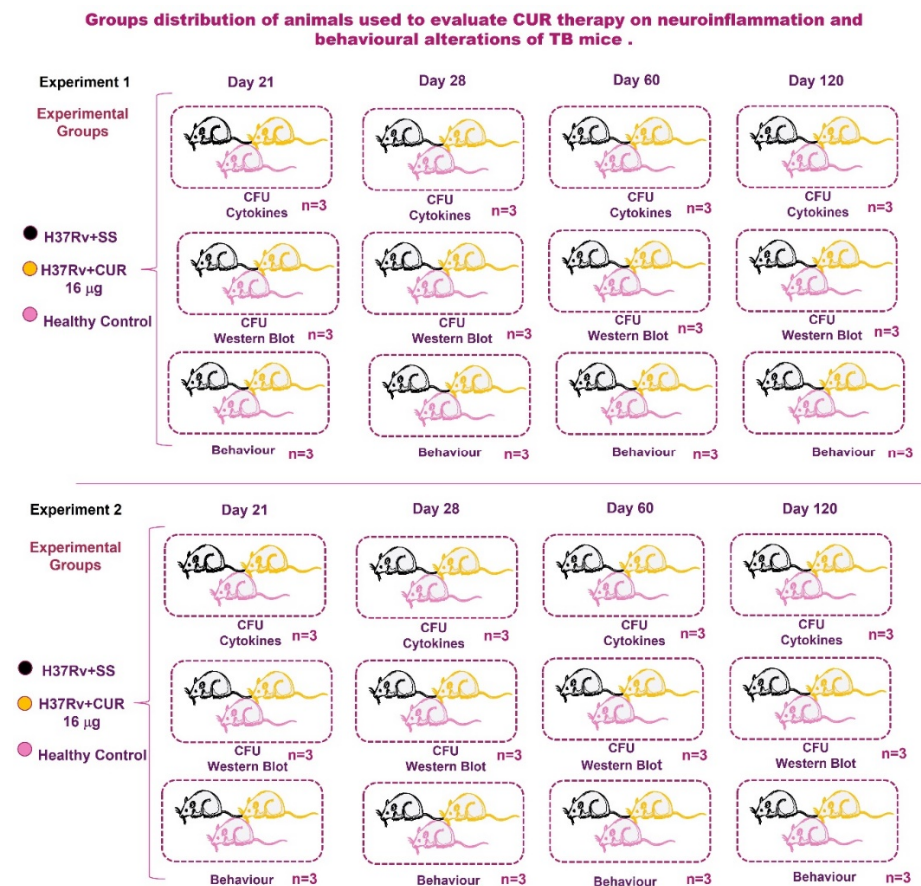

**Figure S2.** Animals groups distributions used to evaluate CUR treatment on neuroinflammation and behavioural alterations of TB mice per experiment. Two independent experiments were done, and 216 mice were used (9/day/group/experiment).

**Table S1.** Neurological Severity Score (NSS) for mice. Modified from Stahel et al., 2000 [1].

| Task                        | Description                                                                                                                                                                                                                          | Points  |         |
|-----------------------------|--------------------------------------------------------------------------------------------------------------------------------------------------------------------------------------------------------------------------------------|---------|---------|
|                             |                                                                                                                                                                                                                                      | Success | Failure |
| Hypomobility                | Lower spontaneous mobility of the experimental mouse as compared with that of the external control when placed (30 s) on the top of the table. Scored 1,2 or 3 regarding locomotion, and speed and vigors of movements.              | 0       | 1,2,3   |
| Lateralized posture         | Abnormal body position characterized by a persistent tendency to recline sideward                                                                                                                                                    | 0       | 1       |
| Flattened posture           | Abnormal body position characterized by slow movements and dragging the body along the tabletop                                                                                                                                      | 0       | 1       |
| Hunched back                | The persistent presence of a crouched posture                                                                                                                                                                                        | 0       | 1       |
| Piloerection                | Persistent rise of the back hair.                                                                                                                                                                                                    | 0       | 1       |
| Ataxic gait                 | The tendency to sway, rock, or lurch to the side as the animal proceeds forward.                                                                                                                                                     | 0       | 1       |
| Circling                    | Spontaneous or forced (gently pushing with one finger) walking consistently to one side.                                                                                                                                             | 0       | 1       |
| Tremors                     | Presence of fine, repetitive, oscillatory movements observed during movement.                                                                                                                                                        | 0       | 1       |
| Twitches                    | Abrupt body jerks.                                                                                                                                                                                                                   | 0       | 1       |
| Convulsions                 | Repetitive twitches followed by extensions of the hind limbs.                                                                                                                                                                        | 0       | 1       |
| Respiratory distress        | Presence of increased, irregular, respiratory movements accompanied by breathing sounds.                                                                                                                                             | 0       | 1       |
| Passivity                   | Characterized by the decreased behavioural response (struggle and escape) when the animals are covered with the hand to restrain movement.                                                                                           | 0       | 1       |
| Hyperreactivity             | Characterized by the exaggerated behavioural response (struggle and escape) when the animals are covered with a hand to restrain movement.                                                                                           | 0       | 1       |
| Irritability                | Characterized by aggressive posture and biting behaviour exhibited by the animals when covered with a hand to restrain movement.                                                                                                     | 0       | 1       |
| Ptoxis                      | Closure of dropping of the upper eyes.                                                                                                                                                                                               | 0       | 1       |
| Urination                   | An excessive amount of urine on the animal's body and the tabletop                                                                                                                                                                   | 0       | 1       |
| Decreased body tone         | Characterized by relatively less resistance to compression or flaccidity of the abdominal muscles, determined by gentle compression of the sides of the animal between the lower thorax and pelvis using the thumb and index finger. | 0       | 1       |
| Forelimb flexion            | Failure to extend one forepaw fully when the animal is held by the tail to a height of 10 cm and slowly lowered to observe symmetry in the outstretching of both forelimbs while the mouse reached the wire-mesh.                    | 0       | 1       |
| Decreased muscle strength   | Characterized by decrease resistance when the animal is placed off the grid and gently drawn backwards by the tail.                                                                                                                  | 0       | 1       |
| Body rotation               | Rolling along the axis of its body when the animal is held by the tail.                                                                                                                                                              | 0       | 1       |
| Motor incoordination        | Characterized by decrease capacity to move and remain for at least 10 s on the inclined plane (45°) or to grasp the cord (30 cm above the tabletop) with limbs and tail, and to remain there for a least 10 s.                       | 0       | 1,2,3   |
| Absence of equilibrium      | Characterized by a decreased capacity to remain for at least 10 s on a horizontal bar (1 cm wide). Four paws have to be on the bar.                                                                                                  | 0       | 1,2,3   |
| Hypoalgesia                 | Lack of behavioural response when an arterial claw is placed at 1 cm from the base of the animal's tail.                                                                                                                             | 0       | 1       |
| Hyperalgesia                | Exaggerated behavioural response (disproportional vocalization and biting) when an arterial claw is placed at 1 cm from the base of the animal's tail.                                                                               | 0       | 1       |
| Sensitivity in the whiskers | Behavioural response when animal's moustaches are touched with a hyssop                                                                                                                                                              | 0       | 1       |
| Sensitivity in the abdomen  | Behavioural response when the animal is gently touched in the abdomen.                                                                                                                                                               | 0       | 1       |
| Olfactory sensitivity       | Behavioural response when hyssop with alcohol is placed in the nose of the animal                                                                                                                                                    | 0       | 1       |
| Global Score                |                                                                                                                                                                                                                                      | 31      |         |

## Reference

1. Stahel, P.F.; Shohami, E.; Younis, F.M.; Kariya, K.; Otto, V.I.; Lenzlinger, P.M.; Grosjean, M.B.; Eugster, H.-P.; Trentz, O.; Kossmann, T.; et al. Experimental closed head injury: Analysis of neurological outcome, blood-brain barrier dysfunction, intracranial neutrophil infiltration, and neuronal cell death in mice deficient in genes for pro-inflammatory cytokines. *J. Cereb. Blood Flow Metab.* **2000**, *20*, 369–380, doi:10.1097/00004647-200002000-00019.
